1 **Area-based conservation planning in Japan: protected area network effectiveness to**  
2 **the post-2020 Global Biodiversity Framework**

3

4 Takayuki Shiono<sup>1\*</sup>, Yasuhiro Kubota<sup>1,2\*</sup>, Buntarou Kusumoto<sup>3</sup>

5 <sup>1</sup> Faculty of Science, University of the Ryukyus, Okinawa, Japan

6 <sup>2</sup> Think Nature Inc., Okinawa, Japan

7 <sup>3</sup> Faculty of Agriculture, Kyushu University, Japan

8

9 \*Corresponding author.

10

11 E-mail address: [kubota.yasuhiro@gmail.com](mailto:kubota.yasuhiro@gmail.com), [biodiver.shiono@gmail.com](mailto:biodiver.shiono@gmail.com)

12

13 **ABSTRACT**

14 To reframe the imperfect review processes of nation-scale actions on area-based  
15 conservation through protected area (PA) networks, we first created novel infrastructure  
16 to visualize nation-level biodiversity information in Japan. We then assessed the  
17 performance of the existing PA network relative to land exploitation pressure and  
18 evaluated conservation effectiveness of PA expansion for the post-2020 Global  
19 Biodiversity Framework. The Zonation algorithm was used to spatially prioritize  
20 conservation areas to minimize biodiversity loss and the extinction risk for 8,500  
21 Japanese vascular plant and vertebrate species under constraints of the existing PA  
22 network and land use. The spatial pattern of the identified priority areas, which were  
23 considered candidate areas for expansion of the current PA network, was influenced by  
24 land-use types according to the mask layers of non-PAs, and low-, middle-, and high-  
25 ranked PAs. The current PA network reduced the aggregate extinction risk of multiple

26 species by 36.6%. Indeed, the percentage of built-up areas in the existing PAs was in  
27 general smaller than that in the areas surrounding PAs. Notably, high-ranked PAs fully  
28 restrained built-up pressure (0.037% per 10 years), whereas low-ranked PAs in the  
29 national park and wild-life protection areas did not (1.845% per 10 years). Conservation  
30 effects were predicted to substantially improve by expansion of high-ranked (legally  
31 strict) PAs into remote non-PAs without population/socio-economic activities, or  
32 expansion of medium-ranked PAs into agriculture forestry satoyama and urban areas. A  
33 30% land conservation target was predicted to decrease extinction risk by 74.1% when  
34 PA expansion was implemented across remote areas, satoyama, and urban areas;  
35 moreover, PA connectivity almost doubled compared with the existing PA network. In  
36 contrast, a conventional scenario showed that placing national parks in state-owned and  
37 non-populated areas would reduce extinction risk by only 4.0%. The conservation  
38 prioritization analyses demonstrated an effectiveness of using a comprehensive  
39 conservation approach that reconciles land-sparing protection and land-sharing  
40 conservation in other effective area-based conservation measures (OECM) in satoyama  
41 and urban green spaces. Our results revealed that complementary inclusion of various  
42 PAs interventions related to their governance and land-use planning plays a critical role  
43 in effectively preventing biodiversity loss and makes it more feasible to achieve ambitious  
44 conservation targets.

45

## 46 **1. Introduction**

47 Protected areas (PAs) are fundamental safeguards of biodiversity (Watson et al., 2014).  
48 Therefore, area-based conservation measures have been debated for several decades  
49 (Brundtland Commission, 1987; IUCN, 1994; Maxwell et al., 2020), but it remains  
50 unclear how much area or coverage and what biodiversity should be included within PAs  
51 (e.g., Chape et al., 2005). PA targets are recommended from two perspectives, biological  
52 science and policy-making, based on conservation effects (needs) and socio-economic  
53 costs (Svancara et al., 2005). Conservation scientists advocated that the 25–75% of areas  
54 should be placed within PAs to preserve biodiversity on the planet (Noss et al., 2012);  
55 alternatively, the Convention on Biological Diversity (CBD) set more feasible,  
56 conservative goals across 1992 to 2010, calling for 4–17% protection, to reduce  
57 biodiversity loss. Global Biodiversity Outlook 5 determined that the current Aichi Target  
58 11's 17% protection of the terrestrial surface was partly achieved in many countries by  
59 2020; this is the most successful of all the 20 Aichi targets (CBD Secretariat, 2020a).  
60 Nevertheless, there is still rapid biodiversity loss: one million species are threatened with  
61 extinction (IPBES, 2019), which demonstrates a need for renewed, bold conservation  
62 targets to produce a biodiversity-positive outcome (Maron et al., 2018; Mace et al., 2018).  
63 Therefore, the post-2020 Global Biodiversity Framework proposes a target of 30 % land  
64 conservation (CBD Secretariat, 2020b).

65 Most importantly, area-based conservation targets should not include blindly placed  
66 PAs and increased spatial percentage protection motivated by political considerations or  
67 economic efficiency (Barnes et al., 2018; Magris and Pressey, 2018). Such targets should

68 fundamentally aim for spatially prioritized PA network planning; “quality, not quantity  
69 (size), matters” (Pimm et al., 2018) means effectively capturing representativeness,  
70 ecological connectivity, and areas of importance for biodiversity patterns that are  
71 underpinned by ecological and evolutionary processes (Klein et al., 2009; Arponen, 2012;  
72 Arponen and Zupan, 2016). Therefore, biologically oriented PA expansion is a delicate  
73 mission in social equity when balancing conservation interventions and land-use policies  
74 (Moilanen and Arponen, 2011). Increasing the number of strict PAs to focus on global  
75 biodiversity, such as the ambitious suggestion of a “half-earth” initiative to protect 50%  
76 of the surface and capture approximately 85% of species (Wilson, 2016), may be  
77 infeasible in most countries with highly complicated land-use policies that involve  
78 stakeholder interaction (Büscher et al., 2016). In fact, only one-fifth of the Key  
79 Biodiversity Areas, which are defined as “sites of importance for the global persistence  
80 of biodiversity” (IUCN, 2016), are fully covered by PAs (Butchart et al., 2015), which  
81 indicates a compromised outcome behind conservation priorities.

82 “Other effective area-based conservation measures” (OECM) is an alternative  
83 solution to bridge the gap between socio-economic feasibility and bold conservation  
84 targets (Dudley et al., 2018; Bhola et al., 2020; Alves-Pinto et al., 2021). Notably, OECM  
85 is defined by conservation outcomes through community-led or private efforts (Jonas et  
86 al., 2014) when landscape management is shared with agricultural/forestry or indigenous  
87 traditional land use, and has less strict protection or lacks legal restriction. This  
88 conceptually may reflect the “third-of-third” conservation initiative by Hanski (2011): a  
89 third of the land area is moderately managed as multi-objective conservation landscapes,

90 within which a third of the area is protected. For example, the rural landscape  
91 management of satoyama and urban greening in Japan provides ancillary benefits to  
92 biodiversity conservation through wildlife habitat diversification related to traditional  
93 social–ecological productions (Washitani, 2001; Kobori and Primac, 2003; Kadoya and  
94 Washitani, 2011). Therefore, a comprehensive approach that reconciles land-sparing and  
95 -sharing conservation would be a practical solution to effectively achieve more ambitious  
96 PA targets with the effectiveness (Maxwell et al., 2020). Moreover, in land-sharing  
97 OECM, securing land exploitation prevention is key for fulfilling the post-2020 Global  
98 Biodiversity Framework (Jonas et al., 2018; Donald et al., 2019); in fact, less strict PAs  
99 in satoyama and urban areas are prone to exploitation under land-use pressures (Kim et  
100 al., 2021).

101 Spatial conservation prioritization (SCP) supports the analytical need for PA targets  
102 in the CBD (Moilanen et al., 2014; Kullberg and Moilanen, 2014). SCP is a well-  
103 established method for identifying irreplaceable priority areas for long-term persistence  
104 of potential biodiversity and essential ecosystem services, and is based on biological and  
105 socio-economic viewpoints (Moilanen et al., 2009; Knight et al., 2011; Kukkala and  
106 Moilanen, 2013). In the SCP analysis, PA network effectiveness for biodiversity  
107 conservation is evaluated by area-dependent reduction of species extinction risks  
108 (Lehtomäki et al., 2019; Hannah et al., 2020) and spatial priority ranking across the  
109 existing PAs from intact landscape to managed (or private) landscape; this optimizes  
110 competing land uses and is computed for each area associated with stakeholder groups  
111 using their spatial layers (Moilanen et al., 2011; Honeck et al., 2020). Therefore, the SCP

112 output facilitates outcome-based assessments of existing PA networks and guides PAs  
113 expansion by implementing top-down national-scale land-sparing and bottom-up private-  
114 led land-sharing conservation. However, the SCP-based effectiveness assessments of the  
115 PA networks have been rarely conducted in individual nations (e.g., Bicknell et al., 2017;  
116 Di Minin et al., 2017).

117 In this study, we measured the conservation effectiveness of the Japanese PA network:  
118 the evaluation involved the spatial design of the existing PAs, the effect of threat reduction,  
119 and the ecological outcome of PA expansion in relative to the Aichi targets and post-2020  
120 Global Biodiversity Framework (Maxwell et al., 2020). Japan is geographically located  
121 in a global biodiversity hotspot: notably, strict PAs placed in state-owned land currently  
122 represent only 3.8% of total land areas, and most PAs (e.g., the national park) include  
123 residential, private lands, such as agriculture and forestry areas, and urban areas, which  
124 allow land exploitation; these areas differ in legal strictness and policies from those of  
125 western countries (Tanaka et al., 2019).

126 We first created a novel system of nation-wide biodiversity features (spatial  
127 distributions of 18,126 species, which included all vascular plants and vertebrates) and  
128 conservation cards with priority scores at the 1 km-grid resolution across the Japanese  
129 terrestrial and marine ecosystems. In this study, we used data from 8,500 terrestrial  
130 species. This information provides scientific evidence for incorporating national/regional  
131 biodiversity conservation strategies into basic plans for the conservation and sustainable  
132 use of biodiversity. Then, we investigated i) effects of exploitation pressure prevention  
133 on the existing PAs, ii) reduction of relative extinction risks by the existing PAs, iii)

134 changes in conservation effectiveness and connectivity among the PA network by nation-  
135 level conservation actions (including the Aichi targets) over the past 20 years, and  
136 predicted iv) predicted improvements under the PA expansion scenarios related to the  
137 post-2020 target. These assessments were conducted by accounting for the existing PAs,  
138 which have different legal strictness regarding protection and different land-use types that  
139 suffer from various exploitation pressures. Finally, we propose an approach for land-  
140 sparing and -sharing conservation across landscape that includes different land-uses types,  
141 and demonstrated the importance of SCP-based PA assessment in formulating  
142 conservation targets and their measurability.

143

## 144 **2. Material and methods**

### 145 *2.1. Study site*

146 Japan mainly consists of the main islands of Japan, the Ryukyu Islands and the Bonin  
147 Islands, which are located off the eastern coast of Asia. These regions range from  
148 hemiboreal to subtropical climatic regions: the mean annual temperature ranges from –  
149 5.3–24.2°C and the annual precipitation ranges from 650–4538 mm. This warm and wet  
150 monsoon climate contributes to development of diverse biota in the Japanese archipelago.  
151 Moreover, these islands are biogeographically located from the Holarctic to the  
152 Palaeotropical regions. The insularity during the Pliocene and Pleistocene intermittently  
153 divided one large regional biota into local communities on individual islands, with  
154 periodic connections reforming through land-bridge corridors. Such complicated  
155 geographical and climatic conditions shaped region-specific endemic biodiversity pattern

156 through dispersal limitation and climate-related energy availability (Kubota et al., 2014,  
157 2015, 2017). Therefore, Japan, which harbors ecologically and/or evolutionarily  
158 distinctive biota ranks among the top 35 global biodiversity hotspots (Mittermeier et al.,  
159 2011). Indeed, recent human impacts have destroyed most lowland habitats and posed  
160 threats to biodiversity hotspot conservations. Consequently, Japan serves as an ideal  
161 region where conservation biogeographers can develop spatial prioritization measures for  
162 the PA network for capturing ecological and evolutionary potential.

163

## 164 *2.2. Biodiversity features*

165 We created the Japan Biodiversity Mapping Project (J-BMP) database based on  
166 species occurrence information (n = 13,366,641 for 8,500 vascular plants and vertebrate  
167 species (Table S1). For decades, substantial knowledge of Japanese natural history has  
168 been accumulating through research activities and environmental assessments  
169 individually run by researchers, local governments, environmental assessment companies,  
170 and citizen scientists. Species occurrence, functional traits, and phylogeny data have been  
171 thoroughly compiled in J-BMP. Detailed descriptions of these data can be found on the J-  
172 BMP website (<https://biodiversity-map.thinknature-japan.com/index.html>).

173 Species distribution models were developed using Maxent version 3.4.1 (Phillips et  
174 al., 2006) with 52 environmental variables, which included climatic, soil, geological,  
175 topographical, and geographical conditions, as the predictor variables (Table. S2); these  
176 variables were previously proposed to be potentially important factors that explain  
177 biodiversity distributions in this region (Kubota et al., 2015, 2017). We binarized (1/0)



178 the predicted suitability at the 1-km grid cell-level using the sensitivity–specificity sum  
179 maximizer threshold (Jiménez-Valverde and Lobo, 2007), and confirmed the accuracy of  
180 each model using the area under the receiver operating characteristic curve (Fig. S1).  
181 Moreover, we corrected commission errors of binarized presence/absence predictions  
182 with *ex post facto* design by validating the observed presence/absence data, such as  
183 regional species checklists, northern/southern limits of individual species distributions,  
184 and species compositions sampled at local communities (e.g., a number of vegetation  
185 samples and monitoring sites). The predicted species distributions were stacked, and  
186 species richness maps were visualized for individual taxa (e.g., plants, vertebrates, insects,  
187 stony corals, crustaceans, and shellfish etc.) on the J-BMP web site.

188

### 189 *2.3.PA data*

190 We extracted the spatial data of all PAs from Digital National Land Information  
191 (<https://nlftp.mlit.go.jp/ksj/>) and Natural Environmental Information GIS  
192 ([http://www.biodic.go.jp/trialSystem/top\\_en.html](http://www.biodic.go.jp/trialSystem/top_en.html)) (Table S3). We classified these PA  
193 categories for biodiversity conservation into three ranks on the basis of strictness of legal  
194 protection: high = economic activities are strictly forbidden; medium = public permission  
195 is required for economic activities, and small-scale land exploitation and agriculture or  
196 forestry in private lands are allowed; and low = public permission is required for  
197 economic activities such as large-scale land exploitation and also agriculture or forestry  
198 in private lands are allowed. Subsequently, we created binary (1/0) maps of PAs for each  
199 rank at the 1-km grid cell level by defining PAs for which more than 50% protected of

200 100 100-m cells (100 ha) were protected. In total, approximately 20.3% of the land area  
201 was designated as PAs (high = 3.8%, medium = 6.9% , and low = 9.6%).

202

#### 203 2.4.Land-use data

204 We compiled the data on land-use types at 1-km grid cell resolution. We first  
205 categorized individual cells into residential land-use types on the basis of the land-use  
206 subdivision mesh of the National Land Information Division, National Spatial Planning  
207 and Regional Policy Bureau, MLIT of Japan  
208 (<https://nlftp.mlit.go.jp/ksj/gml/datalist/KsjTmplt-L03-b.html>) and human population  
209 density (<https://nlftp.mlit.go.jp/ksj/gml/datalist/KsjTmplt-mesh1000h30.html>). These  
210 residential land-use types included built-up areas; road and rail-way construction areas;  
211 agricultural land types, such as orchards; or forestry/grassland types, such as coastal  
212 vegetation and urban areas.

213 Urban areas were defined by dominance of residential land. Agriculture areas were  
214 defined as farmland areas (e.g., rice fields) in lowland areas. Satoyama areas were defined  
215 as areas for which more than 45% of the area included at least two of the following three  
216 land types based on National Actual Vegetation map  
217 ([https://www.biodic.go.jp/kiso/vg/vg\\_kiso.html](https://www.biodic.go.jp/kiso/vg/vg_kiso.html)): i) agricultural land that contained  
218 natural vegetation and for which naturalness was ranked as 2 or 3, ii) secondary grass  
219 lands for which naturalness was ranked as 4 or 5, and/or iii) secondary forested lands with  
220 a predominance of *Castanopsis* or *Quercus* species and naturalness ranked as 7 or 8. The  
221 areas that were not populated, which was not applicable to urban, agricultural, and

222 satoyama areas, were defined as remote areas, which were mostly located in mountain  
223 areas. Based on these land type classifications, we categorized all 1-km grid cells across  
224 Japan into four types of urban areas (5.8% of total land area), agricultural areas (18.0%),  
225 satoyama (45.0%), and non-populated remote mountain areas (31.2%).

226

## 227 *2.5. Land exploitation prevention assessment by PA*

228 In high-, medium-, and low-ranked PAs, we compared the composition of land-use  
229 types with their surrounding areas; the surrounding areas within a 5-km radius of existing  
230 PAs were defined as non-PAs. Moreover, to assess prevention effects of the PA network  
231 on land exploitation, we investigated built-up areas from 2006 to 2016 for each PA rank  
232 and category (e.g., natural parks, natural conservation areas, and wild-life conservation  
233 areas). To calculate naturalness score, we re-categorized land types into residential,  
234 agricultural, or forestry/grassland areas on the basis of land-use information, which  
235 included built-up areas, road and rail-way construction areas, cultivated areas, and  
236 orchards. We scored residential, agricultural, and forestry/grassland areas as 0, 1, and 2,  
237 respectively, and then counted total naturalness scores at a 100-m scale for each PA. The  
238 decrease of naturalness score from 2006 to 2016 was defined as built-up pressure: if  
239 forestry/grassland areas were replaced with residential areas, the change of naturalness  
240 score was calculated as a 100% decrease; if land-use type did not shift during this period,  
241 it was calculated as 0%. However, because we only focused on prevention of built-up  
242 pressure by PAs, we ignored increments of naturalness score (e.g., secondary succession  
243 from agricultural areas to forest/grasslands). Additionally, we evaluated the spatial

244 distribution of solar power systems (their number and area at 1 km-grid resolution), which  
245 has recently been considered typical land exploitation in satoyama and agricultural areas  
246 with semi-natural environments (Kim et al., 2021). Spatial distribution of solar power  
247 facilities was derived from information on certification of renewable energy power  
248 generation business plans in October 2020. In this assessment, we focused on the amount  
249 of solar power facilities that generate >20 kw per 1 km<sup>2</sup> in the existing high-, medium-,  
250 and low-ranked PA and non-PAs.

251

## 252 *2.6. Spatial conservation priority analysis*

253 We used Zonation software, which produces a balanced, complementarity-based  
254 ranking of conservation priority across the area of interest based on a set of input spatial  
255 features (Moilanen et al., 2009; Moilanen et al., 2014; Kullberg and Moilanen, 2014;  
256 Lehtomäki et al., 2019). Starting from the full landscape, Zonation iteratively ranks and  
257 removes cells that lead to the smallest aggregate loss of conservation value while  
258 accounting for total and remaining distributions of (potentially) weighted features and  
259 other relevant factors such as connectivity, costs, or habitat condition. For this analysis,  
260 we used 8,500 species distribution layers at the 1 km-grid resolution (377,589 cells),  
261 which included J-BMP-derived data from 7,346 vascular plants, 77 amphibians, 103  
262 reptiles, 607 birds, 136 mammals, and 231 freshwater fishes. Because these groups widely  
263 cover foundation and umbrella taxa with diverse taxon-dependent biogeographic patterns  
264 (Lehtomäki et al., 2019), we assumed that they well represent the biodiversity pattern in  
265 Japan.

266 We conducted spatial prioritization using the continuous suitability predictions of  
267 individual species within their presence cells. In this computation, we included all species  
268 across all taxa to detect priority areas for expansion of the existing PAs using the additive  
269 benefit function (ABF) methods; this allowed achievement of cost-efficient species  
270 coverage (Moilanen et al., 2014). The ABF minimizes aggregated extinction risk and  
271 implicitly places higher priority on species-rich cells because the algorithm sums  
272 conservation values over all species in a cell (Moilanen, 2007). For individual taxa, we  
273 weighted each species by a compound weight on the basis of the Japanese Red List  
274 category (RLC; least concern = 1, near threatened = 2, vulnerable = 4, endangered = 6,  
275 critically endangered = 8, data deficient = 2). To aggregate all species across different  
276 taxa ( $j$ ) with different number of species ( $N_j$ ), we normalized the aggregate weight ( $AGG_j$ )  
277 for each taxon with  $N_j$  to account for the rather different numbers of species that belonged  
278 to different taxa. The weight  $w$  of species  $i$  in taxon  $j$  was then defined as follows:  $w_{i,j} =$   
279  $(RLC_i \times AGG_j)/N_j$ .

280 To identify the most cost-effective complementary additions to the current PA  
281 network, we used hierarchical mask analysis in Zonation to account for high-, medium,  
282 low-ranked PAs, remote non-PAs, satoyama areas, and urban areas. This analysis forced  
283 the highest priorities into the high-ranked PAs, followed by the medium and low-ranked  
284 PAs, finally the non-PAs of the landscape (Moilanen et al., 2011; Lehtomäki et al., 2019).  
285 Therefore, the hierarchical mask was used to implement gap analysis on the current PA  
286 network and revealed cost-efficient gap filling for future PA expansion: the top-priority,  
287 non-PAs are the most cost-effective complementary additions to the PA network

288 (Lehtomäki et al., 2009).

289

### 290 *2.7. Aggregated relative extinction risk*

291 Using the Zonation analysis output (relationship between land loss and species' range  
292 loss), we evaluated the relative extinction risk across multiple taxa. In the spatial  
293 prioritization of Zonation, the relative reduction (V) of distribution (R) for  $i$ -th species is  
294 defined as  $V_i = R_i^z$ ; in our analysis, the parameter  $z$  was set as 0.25. Therefore, species-  
295 specific extinction risk ( $ER_i$ ) relative to the proportion of PA coverage in total land areas  
296 was calculated as  $ER_i = 1 - R_i^z$ . We calculated the aggregated ER over species of multi-  
297 taxon as the sum of individual species' remaining extinction risk across all species relative  
298 to the spatial design of the PA network (Hannah et al., 2020).

299

### 300 *2.8. Connectivity*

301 PA connectivity was evaluated by the ProtConn index (Saura et al., 2017).  
302 ProtConn is defined as the percentage of a country that is covered by protected and  
303 connected lands, and includes the four fractions that account for intra- and inter-PA  
304 connectivity by moving between different PAs. ProtConn increases as area increases  
305 among connected PAs or as distance decreases between the disconnected PAs, and the  
306 maximum value of ProtConn corresponds to PA coverage (%) in total land areas. In  
307 ProtConn computation, distance thresholds were set to 10 km to represent the potential  
308 dispersal distance for species between PAs, and the probability of direct dispersal to other  
309 separated PAs was defined as 50% (Saura et al., 2018).

310

311 *2.9. Improvement assessment: past and future PA expansion*

312           We retrospectively and prospectively evaluated the conservation effectiveness  
313 of PA expansion retrospectively and prospectively. First, we delineated spatial  
314 distributions of PAs every 10 years during 2000–2020, and evaluated the reduction of the  
315 aggregated ER by the proportion of PA coverage and the connectivity (ProtConn) of the  
316 PA network.

317           Second, we simulated PA expansion following a post-2020 target (i.e., increasing PA  
318 up to 30%) based on spatial prioritization with the mask layer. To examine how the  
319 existing PA network should be expanded under the hierarchical protection system (high-,  
320 medium-, and low-ranked PAs) and heterogeneous land-use types, we built two scenarios.  
321 In the OECM scenario, we selected candidate areas from high-ranked PAs in remote areas,  
322 medium-ranked PAs in satoyama and agricultural areas, and low-ranked PAs in urban  
323 areas; these were selected based on the saturating patterns of the relative extinction curves.  
324 These expansion scenarios of new PAs across national lands in remote areas and private  
325 lands in satoyama, agricultural, and urban areas are based on the concept of combining  
326 land-sparing protection with a land-sharing approach through OECM. Alternatively, in  
327 the conventional (business-as-usual) scenario, we selected candidate expansion areas  
328 only from national land areas (national forests). In both scenarios, we evaluated their  
329 conservation outcomes as the changes in the aggregated ER and ProtConn.

330

331 **3. Results**

332 *3.1. Built-up pressure prevention in PAs*

333 The compositions of land-use type across the inside to outside of existing PAs  
334 corresponded to their legal strictness of protection (Table 1): high-ranked PAs were  
335 mostly comprised of remote areas, and medium/low-ranked PAs and the areas  
336 surrounding PAs included satoyama and agricultural areas. The percentage of built-up  
337 areas in the existing PAs was generally smaller than that in the areas surrounding PAs  
338 (Table 1): high-ranked PAs fully restrained built-up pressure, whereas low-ranked PAs in  
339 the national park and wildlife protection areas did not, especially in comparison with  
340 high- and medium-ranked PAs. In fact, the amount of solar power facilities in low-ranked  
341 PAs and/or the areas surrounding PAs was greater than that in high/middle-ranked PAs  
342 (Table 1).

343

344 **Table 1.** Percentage of land types on the inside and outside of the existing protected  
345 areas (PAs), built-up pressure on the existing PAs, and the amount of solar power  
346 facilities with >20kW per 1km<sup>2</sup> in the existing PAs. These were assessed for high-  
347 ranked PAs (High), medium-ranked PAs (Medium), low-ranked PAs (Low), and  
348 surrounding non- PAs (Surrounding) based on land-use changes between 2006 and  
349 2016.

| Legal<br>Strictness on<br>land use in<br>protected<br>areas (PA) | Remote<br>area<br>ratio<br>(%) | Satoyama<br>area ratio<br>(%) | Agricultural<br>area ratio<br>(%) | Urban<br>area<br>ratio<br>(%) | Built-up<br>pressure<br>(%) | Amount of<br>solar power<br>facility<br>(kW/1km <sup>2</sup> ) |
|------------------------------------------------------------------|--------------------------------|-------------------------------|-----------------------------------|-------------------------------|-----------------------------|----------------------------------------------------------------|
| High-ranked<br>PA                                                | 90.0                           | 6.2                           | 3.3                               | 0.5                           | 0.037                       | 0.2                                                            |



|                  |      |      |      |     |       |      |
|------------------|------|------|------|-----|-------|------|
| Medium-ranked PA | 51.4 | 32.9 | 12.6 | 3.2 | 0.518 | 34.7 |
| Low-ranked PA    | 35.6 | 41.3 | 17.7 | 5.3 | 1.845 | 296  |
| Surrounding PAs  | 24.7 | 49.6 | 18.8 | 6.9 | 2.588 | 557  |

---

350

### 351 3.2. Extinction risk reduction in the existing PA network

352 Identified conservation priority areas of terrestrial biodiversity, which included  
353 vascular plants and vertebrates were heterogeneous across Japan, especially in the middle  
354 of Honshu Island and across the Ryukyu Islands and Bonin Islands (Fig. 1): these priority  
355 areas were consistent regardless of mask layers.

356

357 1) without mask layer

2) with mask layer

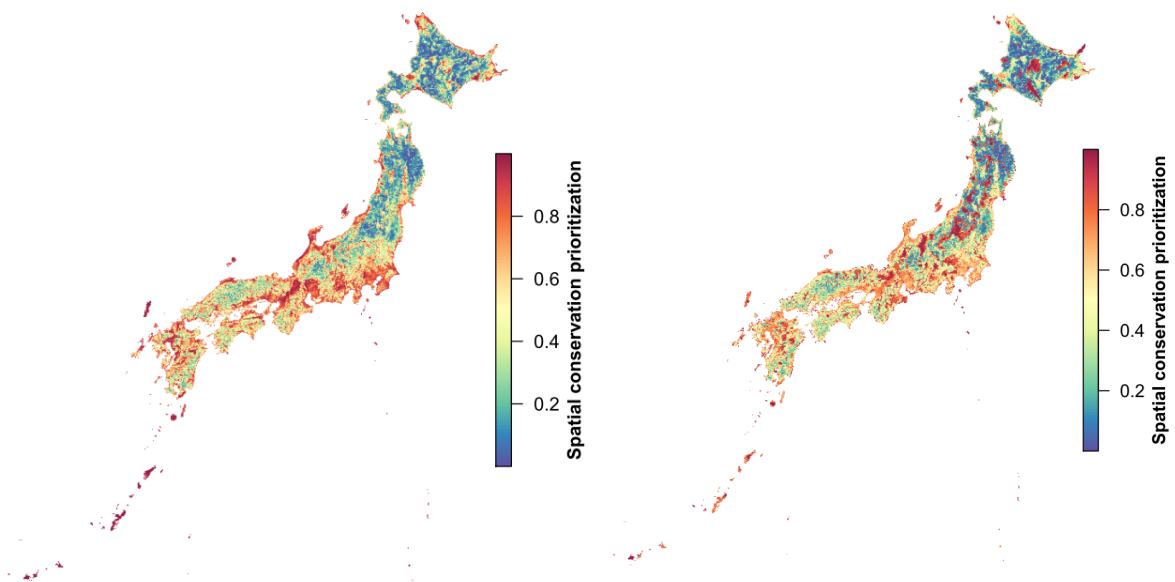

358

359 **Fig. 1.** Priority areas of biodiversity conservation in Japan. Spatial conservation  
360 prioritization was based on biodiversity features across multi-taxon (8,500 species in  
361 total) and the related analysis was conducted by using the Zonation software: 1-km grid  
362 cell-level information was provided by the Japan Biodiversity Mapping Project (J-BMP;

363 Fig. 1). The mask layer analysis accounted for high-, medium-, low-ranked protected  
364 areas (PAs), and remote non-PAs, satoyama areas, and urban areas. This analysis forces  
365 the highest priorities into the high-ranked PAs, followed by the medium- and low-ranked  
366 PAs, and finally the non-PAs of the landscape.

367

368           The existing PA network contributed to reducing the aggregate extinction risk  
369 of multiple species by 36.6% (Fig. 2): high-ranked PAs (3.73% of total land area) reduced  
370 extinction risk by 12.7%, and high- and medium-ranked PAs (10.9% of total land areas)  
371 reduced extinction risk by 25.6%. The slope of the relative extinction curve was relatively  
372 gentle within the current PAs but became steep in non-PAs. For the individual taxa  
373 (mammal, bird, reptile, amphibian, freshwater fish, and vascular plant), the aggregated  
374 relative extinction risk exponentially decreased with increasing land coverage across  
375 priority areas (Fig. S2). For all taxa, extinction risk decay rates became substantially  
376 smaller if more than 15% of land coverage was considered priority areas, and relative  
377 extinction risk was expected to reduce 30–40% (Fig. S2).

378

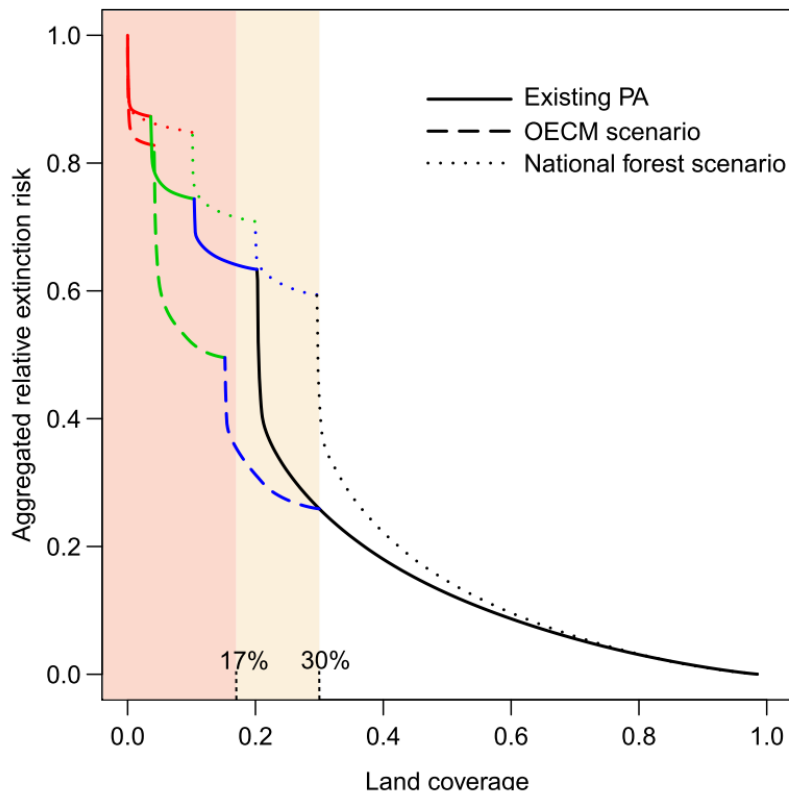

379

380 **Fig. 2.** Conservation effectiveness of the current protected area (PA) network and 30%  
381 land conservation scenarios in the post-2020 Global Biodiversity Framework target that  
382 expands PAs into non-PAs. PAs effectiveness was evaluated by the reduction of  
383 aggregated relative extinction risk of all vascular plants and vertebrate species distributed  
384 in Japan. Red, green and blue curves showed conservation effectiveness of the high-,  
385 medium-, and low-ranked PAs, respectively, as increasing PA coverages across mask  
386 layers of land-use types. The solid line shows the conservation effectiveness of the current  
387 protected area. The dashed line shows the expected conservation effectiveness of a  
388 comprehensive approach that combines land-sparing protection and other effective area-  
389 based conservation measures (OECM) in satoyama and urban areas: specifically, high-  
390 ranked PAs expanded into remote state-owned areas (national forests), medium-ranked  
391 PAs into satoyama and agricultural areas, and low-ranked PAs into urban areas. The  
392 dotted line shows the expected conservation effectiveness of a conventional approach that  
393 only expanded PAs into national land areas (national forests).

394

395

396 *3.3. Conservation effectiveness improvement: past and future*

397           The total PA area increased from 74,741 to 75,892 km<sup>2</sup> during 2010 to 2020.  
398   The existing PA network in 2010 reduced 35.2% of the aggregate extinction risk. The PAs  
399   expansion from 2010 to 2020, which was implemented to meet the Aichi targets, reduced  
400   the aggregate extinction risk by 1.4% and improved the PA network connectivity (Fig. 3).  
401   The spatial pattern of priority areas, which were assumed to be candidate areas to expand  
402   the current PA network, was influenced by land-use types according to the mask layers of  
403   non-PAs, and low-, middle-, and high-ranked PAs (Fig. 4). Under PA expansion up to  
404   30% of total land area, the OECM scenario, which expands the PAs in priority areas  
405   across remote, satoyama, and urban areas, predicted 74.1% reduction in total aggregate  
406   extinction risk (Figs. 2 and 3b) and almost doubled connectivity with the current PA  
407   network (Fig. 3). Specifically, expansion of high-ranked (legally strict) PAs in remote  
408   non-PAs (0.57% of land area) without population/socio-economic activities, or expansion  
409   of medium-ranked PAs in agriculture–forestry satoyama and expansion of low-ranked  
410   PAs in urban areas (6.34% and 2.76% of land area, respectively) substantially improved  
411   conservation effectiveness. In contrast, the conventional scenario, which solely assumed  
412   PA expansion in remote, state-owned areas (e.g., national forests) reduced extinction risk  
413   by only 4.0%.

414

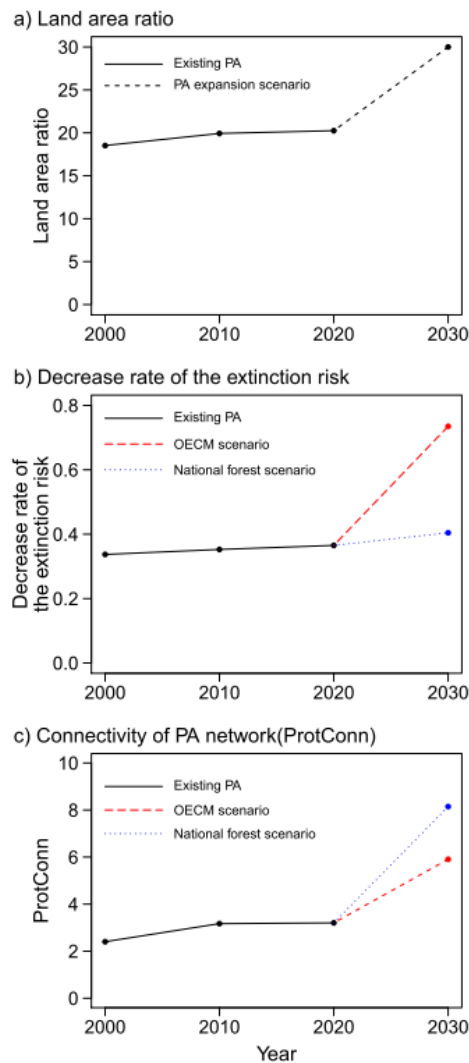

415

416 **Fig. 3.** Nation-level progress of the protected area (PA) network and conservation  
417 effectiveness over the past 20 years. Conservation effectiveness was evaluated by land  
418 area ratio (%) of PAs, reduction of aggregated extinction risk, and connectivity of PAs  
419 every 10 years during 2000 to 2020. The conservation outcome of the post-2020 target  
420 (30% PAs of total land area) was predicted based on the PA expansion in priority areas  
421 across remote, satoyama, and urban areas that were identified in Fig. 2. The OECM  
422 scenario represented a comprehensive approach that combines land-sparing protection  
423 and land-sharing conservation in satoyama and urban areas, whereas national forest  
424 scenario represented a conventional approach that only expands PAs into state-owned  
425 forests.

426

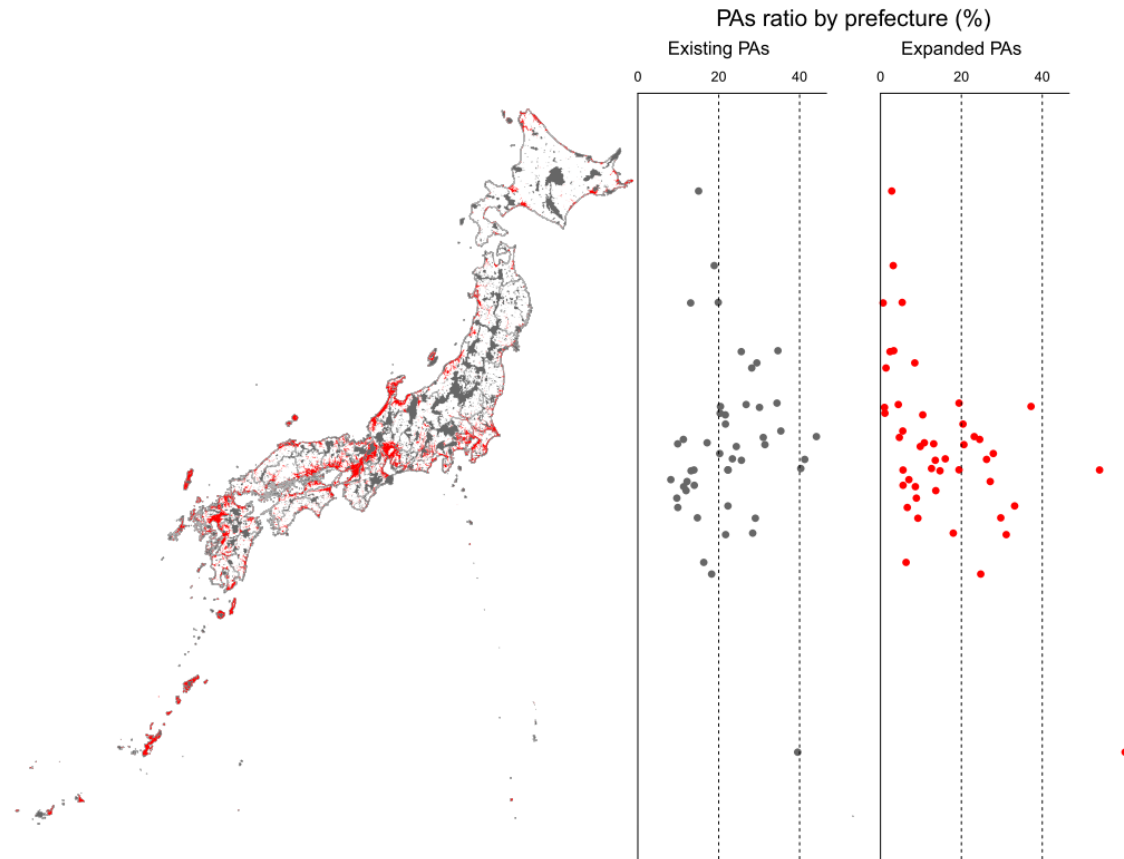

427

428 **Fig. 4.** A protected area (PA) network that achieved the post-2020 Global Biodiversity  
429 Framework's target of 30% PA coverage. Red and black areas show the expanded and  
430 existing PAs, respectively.

431

### 432 **3. Discussion**

#### 433 *4.1. Conservation priority areas reduce extinction risk*

434 Japanese nation-scale conservation priorities have been evaluated based on

435 biological irreplaceability and the human influence index to determine

436 threats/vulnerability (Kusumoto et al., 2017; Kubota et al., 2017; Lehtomäki et al., 2019).

437 Additionally, the importance of area-based measures have been argued by accounting for

438 land-use types, such as natural forests, managed forests, agricultural areas, and urban

439 areas, which are associated with the distribution of conservation benefits and cost among  
440 local stakeholders to balance their social equity (Kubota et al., 2019). Therefore, the  
441 present SCP-based analysis measured the outcomes/effectiveness of the PA network  
442 based on the prevention of built-up pressure, the response curves of species, or aggregated  
443 extinction risk when increasing land conservation according to higher priority scores  
444 within different land-use types, which included current PAs, non-populated remote areas,  
445 satoyama (agro-forestry), agricultural areas, and urban area. Importantly, extinction risk  
446 reduction was gradual (Fig. 2), which indicated no clear thresholds such as a biologically  
447 appropriate safe limit of PA size, although the protection of 40% habitat (e.g., forest lands)  
448 to promote biodiversity persistence was empirically suggested from the relationship  
449 between habitat loss and ecological responses (Swift and Hannon, 2010; Arroyo-  
450 Rodríguez et al., 2020). Our SCP results provide scientific guidelines for nation-level  
451 actions in the framework of international (or national) conservation targets, and revealed  
452 that PAs should be maximized as much as possible to halt biodiversity loss.

453

#### 454 *4.2. Post-2020 PA network balancing land-sparing and -sharing conservation*

455 The total coverage of all PAs in Japan has already achieved 20.3%, which is  
456 more than Aichi Target 11. Nonetheless, the existing Japanese PA network partially failed  
457 to prevent human impacts on priority areas: indeed, low-ranked less-strict PAs that  
458 accounted for 47.3% of total PAs were inadequate for restraining built-up pressure (Table  
459 1), such as solar power plant deployment (Kim et al., 2021), although the current PA  
460 network reduced the aggregate extinction risk of multiple species by 36.6% (Fig. 2). This

461 ineffectiveness of the current PA network is because high-ranked PAs are mostly located  
462 in areas with limited economic value (Kusumoto et al., 2017), as reported in  
463 nation/global-scale analyses (Venter et al., 2014; Jenkins et al., 2015). Kadoya et al.  
464 (2014) also showed that the current PA coverage is not sufficiently effective for halting  
465 extinction rate of endangered plant populations. Therefore, the conservation effectiveness  
466 of PA networks can never be achieved alone with a government-led top-down approach  
467 that focuses on nationally, owned land areas. In fact, higher ranked priority areas were  
468 substantially found privately managed lands used for agriculture or forestry and  
469 around/within urban areas that resulted in leakage from current area-based conservation  
470 planning (Ewers & Rodrigues, 2008).

471           Notably, the SCP outputs predicted that 30% land conservation according to  
472 priority score should reduce extinction risk by 74.1% (Fig. 2). Specifically, the expansion  
473 of high-ranked (strict) PAs in remote areas mostly without human populations and socio-  
474 economic activities (Fig. 2), and expansion of medium-rank PAs in managed satoyama  
475 and agricultural areas substantially improved conservation effectiveness by halting  
476 biodiversity loss (Fig. 2). Alternatively, the current low-ranked PAs had few restrictions  
477 on preventing land exploitation (Table 1). In fact, a number of priority areas was identified  
478 in private lands including urban areas across low-ranked PAs and non-PAs, which were  
479 distributed across Tokyo, Osaka, Kyoto, Aichi, and Fukuoka (Fig. 2), were seriously  
480 exposed to built-up pressure (Table 1). The PA expansion strategy across remote mountain,  
481 satoyama, agricultural, and urban areas contrasted with that of conventional conservation  
482 based solely on land-sparing approaches (e.g., placing national parks in state-owned



483 areas); only expanding PAs solely in remote, non-populated areas reduced extinction risk  
484 by only a few percentage points (Fig. 2). Most national forests distributed in remote  
485 mountain areas are sufficiently captured by the existing PAs; thus, they are ineffective as  
486 candidate areas for PA expansion.

487           Several previous studies reported that well-managed traditional land uses are  
488 not necessarily in conflict with biodiversity conservation (e.g. Katoh et al., 2009; Jiao et  
489 al., 2019). Those studies suggested that the network of rural land areas enlarges the size  
490 of wildlife habitats and potentially plays a complementary role in area-based multi-use  
491 conservation measures. Therefore, combining private sectors' actions in non-nationally  
492 owned areas, such as sustainable managements of rural/peri-urban landscapes, with the  
493 PA network through legal means is key to sufficiently protecting biological priority areas  
494 and           implement           the           Satoyama           initiative  
495 ([http://www.env.go.jp/nature/satoyama/syuhourei/practices\\_en.html](http://www.env.go.jp/nature/satoyama/syuhourei/practices_en.html)) (Kozar et al., 2019).  
496 Our analysis demonstrated that satoyama, agricultural, and urban areas represent  
497 substantial biodiversity, such as species in lowland waterside environments. Moreover, in  
498 a 30% area-based conservation scenario, which balances land-sparing PAs in state-owned  
499 land and OECM in satoyama, the PAs connectivity almost doubled compared with the  
500 existing PA network (Fig. 4). Therefore, a comprehensive approach that combines land-  
501 sparing protection in state-owned areas and land-sharing OECM in private land areas  
502 contributes to managing leakage and promoting resilience of the current PA network.  
503 Implementing various complementary PAs interventions related to their governance and  
504 land-use planning plays a critical role in preventing species extinction and biodiversity

505 loss, and may makes it feasible to achieve ambitious conservation targets. Consequently,  
506 a more flexible approach across hard/soft protection measures, which include OECM  
507 (Jonas et al., 2014), community-based conservation (Brooks et al., 2012), and privately  
508 PAs (Bingham et al., 2017), is required to enhance the PA effectiveness in the post-2020  
509 strategic goals (Bingham et al., 2017; Bhola et al., 2020).

510

#### 511 *4.3. Importance of nation-scale rigorous assessments on conservation effectiveness*

512         There is a critical need for scientific assessments of the PA effectiveness in  
513 individual nations (Geldmann et al., 2013; Zafra-Calvo et al., 2017; Xu et al., 2021). All  
514 practices for reversing biodiversity decline are locally implemented by experience-based  
515 solutions and the responsibility lies within each political boundary (Arponen, 2012).  
516 Consequently, translating international commitments into individual nations' actions is  
517 problematic because global-scale protection of biodiversity mostly depends on the details  
518 of how individual countries set spatial priorities for designing PA networks (Pimm et al.,  
519 2018). In this regard, parochialism in conservation actions should also be reconciled with  
520 transnational prioritization on the planet (Hunter and Hutchinson, 1994; Dudley, 1995;  
521 Wells et al., 2010). Nation-specific prioritization measures are more feasible and  
522 increases the local benefits of conservation, which is a positive aspect of parochialism,  
523 by accounting for region-specific constraints, such as land-use planning. However,  
524 individual nation-led collective PA expansion is relatively ineffective compared with  
525 coordinated actions promoted by cosmopolitan SCP outputs (Montesino Pouzols et al.,  
526 2014). Such an efficiency gap (negative aspects of parochialism) between globally

527 identified priority areas and nationally prioritized/designated PAs could be  
528 collaboratively improved by SCP-based review mechanisms (Kullberg et al., 2019).  
529 Moreover, pressures on PAs are expected to intensify because of climate change and  
530 human impacts within PA boundaries or in their surrounding areas (de la Fuente et al.,  
531 2020); notably, these are side effects of land-sparing conservation or the OECM approach.  
532 Therefore, nation-specific effectiveness of land conservation is increasingly unclear or  
533 limited (Geldmann et al., 2013; Coad et al., 2019). In the post-2020 Global Biodiversity  
534 Framework, the performance measurement of PA networks should be conducted more  
535 rigorously to assist nation-specific hard/soft measures on general land-use planning,  
536 which directly supports decision-making processes of the PA expansion and management.

537

#### 538 **Declaration of competing interest**

539 The authors declare no competing financial interests or personal relationships that could  
540 have appeared to influence the work reported in this paper.

541

#### 542 **Appendix. Supplementary materials**

543 Supplementary results to this article can be found online.

544

#### 545 **Acknowledgements**

546 Financial support was provided by the Environment Research and Technology  
547 Development Fund (4-1501 and 4-1802) of the Ministry of the Environment, Japan. This  
548 study was also supported by the Program for Advancing Strategic International Networks

549 to Accelerate the Circulation of Talented Researchers, the Japan Society for the  
550 Promotion of Science.

551

## 552 **References**

- 553 Alves-Pinto, H., Geldmann, J., Jonas, H., Maioli, V., Balmford, A., Latawiec, A.E.,  
554 Crouzeilles, R., Strassburg, B., 2021. Opportunities and challenges of other  
555 effective area-based conservation measures (OECMs) for biodiversity conservation.  
556 *Perspect. Ecol. Conserv.* 19(2), 115–120.  
557 <https://doi.org/10.1016/j.pecon.2021.01.004>.
- 558 Arponen, A., 2012. Prioritizing species for conservation planning. *Biodivers. Conserv.*  
559 21(4), 875–893. <https://doi.org/10.1007/s10531-012-0242-1>.
- 560 Arponen, A., Zupan, L., 2016. Representing hotspots of evolutionary history in  
561 systematic conservation planning for European mammals, in: Pellens R.,  
562 Grandcolas P. (Eds.), *Biodiversity Conservation and Phylogenetic Systematics*.  
563 *Topics in Biodiversity and Conservation*, Springer, Cham, pp. 265–285.  
564 [https://doi.org/10.1007/978-3-319-22461-9\\_13](https://doi.org/10.1007/978-3-319-22461-9_13).
- 565 Arroyo-Rodríguez, V., Fahrig, L., Tabarelli, M., Watling, J.I., Tischendorf, L.,  
566 Benchimol, M., Cazetta, E., Faria, D., Leal, I.R., Melo, F.P.L., Morante-Filho, J.C.,  
567 Santos, B.A., Arasa-Gisbert, R., Arce-Peña, N., Cervantes-López, M.J., Cudney-  
568 Valenzuela, S., Galán-Acedo, C., San-José, M., Vieira, I.C.G., Slik, J.W.F.,  
569 Nowakowski, A.J., Tschardtke, T., 2020. Designing optimal human-modified

- 570 landscapes for forest biodiversity conservation. *Ecol. Lett.* 23 (9), 1404–1420.
- 571 <https://doi.org/10.1111/ele.13535>.
- 572 Barnes, M.D., Glew, L., Wyborn, C., Craigie, I.D., 2018. Prevent perverse outcomes  
573 from global protected area policy. *Nat. Ecol. Evol.* 2 (5), 759–762. [https://doi.](https://doi.org/10.1038/s41559-018-0501-y)  
574 [org/10.1038/s41559-018-0501-y](https://doi.org/10.1038/s41559-018-0501-y).
- 575 Bholra, N., Klimmek, H., Kingston, N., Burgess, N.D., van Soesbergen, A., Corrigan, C.,  
576 Harrison, J., Kok, M.T.J., 2021. Perspectives on area-based conservation and its  
577 meaning for future biodiversity policy. *Conserv. Biol.* 35 (1), 168–178.  
578 <https://doi.org/10.1111/cobi.13509>.
- 579 Bicknell, J.E., Collins, M.B., Pickles, R.S.A., McCann, N.P., Bernard, C.R., Fernandes,  
580 D.J., Miller, M.G.R., James, S.M., Williams, A.U., Struebig, M.J., Davies, Z.G.,  
581 Smith, R.J., 2017. Designing protected area networks that translate international  
582 conservation commitments into national action. *Biol. Conserv.* 214, 168–175.  
583 <https://doi.org/10.1016/j.biocon.2017.08.024>.
- 584 Bingham, H, Fitzsimons, J., Redford, K., Mitchell, B., Bezaury-Creel, J., Cumming T.,  
585 2017. Privately protected areas: advances and challenges in guidance, policy and  
586 documentation. *Parks* 23 (1), 13–28.  
587 <https://doi.org/10.2305/IUCN.CH.2017.PARKS-23-1HB.en>.
- 588 Brooks, J.S., Waylen, K.A., Mulder, M.B., 2012. How national context, project design,  
589 and local community characteristics influence success in community-based  
590 conservation projects. *Proc. Natl. Acad. Sci. U.S.A.* 109 (52), 21265–21270.  
591 <https://doi.org/10.1073/pnas.1207141110>.

- 592 Brundtland Commission, 1987. Our common future: report of the World Commission  
593 on Environment and Development. Oxford University Press, Oxford.
- 594 Büscher, B., Fletcher, R., Brockington, D., Sandbrook, C., Adams, W.M., Campbell, L.,  
595 Corson, C., Dressler, W., Duffy, R., Gray, N., Holmes, G., Kelly, A., Lunstrum, E.,  
596 Ramutsindela, M., Shanker, K., 2016. Half-Earth or Whole Earth? Radical ideas for  
597 conservation, and their implications. *ORYX* 51 (3), 407–410.  
598 <https://doi.org/10.1017/S0030605316001228>.
- 599 Butchart, S.H.M., Clarke, M., Smith, R.J., Sykes, R.E., Scharlemann, J.P., Harfoot, M.,  
600 Buchanan, G.M., Angulo, A., Balmford, A., Bertzky, B., Brooks, T.M., Carpenter,  
601 K.E., Comeros-Raynal, M.T., Cornell, J., Ficetola, G.F., Fishpool, L.D.C., Fuller,  
602 R.A., Geldmann, J., Harwell, H., Hilton-Taylor, C., Hoffmann, M., Joolia, A.,  
603 Joppa, L., Kingston, N., May, I., Milam, A., Polidoro, B., Ralph, G., Richman, N.,  
604 Rondinini, C., Segan, D.B., Skolnik, B., Spalding, M.D., Stuart, S.N., Symes, A.,  
605 Taylor, J., Visconti, P., Watson, J.E.M., Wood, L., Burgess, N.D., 2015. Shortfalls  
606 and solutions for meeting national and global conservation area targets. *Conserv.*  
607 *Lett.* 8 (5), 329–337. <https://doi.org/10.1111/conl.12158>.
- 608 CBD Secretariat, 2020a Global Biodiversity Outlook 5. Montreal.
- 609 CBD Secretariat, 2020b. Zero draft of the post-2020 Global Biodiversity Framework,  
610 CBD/WG2020/2/3. Convention on Biological Diversity, Montreal.
- 611 Chape, S., Harrison, J., Spalding, M., Lysenko, I., 2005. Measuring the extent and  
612 effectiveness of protected areas as an indicator for meeting global biodiversity

613 targets. *Philos. Trans. R. Soc. Lond., B, Biol. Sci.* 360(1454), 443–455.  
614 <https://doi.org/10.1098/rstb.2004.1592>.

615 Coad, L., Leverington, F., Knights, K., Geldmann, J., Eassom, A., Kapos, V., Kingston,  
616 N., de Lima, M., Zamora, C., Cuadros, I., Nolte, C., Burgess, N.D., Hockings, M.,  
617 2015. Measuring impact of protected area management interventions: current and  
618 future use of the Global Database of Protected Area Management Effectiveness.  
619 *Philos Trans. R. Soc. London B Biol. Sci.* 370 (1681), 1–10.  
620 <https://doi.org/10.1098/rstb.2014.0281>.

621 de la Fuente, B., Bertzky, B., Delli, G., Mandrici, A., Conti, M., Florczyk, A.J., Freire,  
622 S., Schiavina, M., Bastin, L., Dubois, G., 2020. Built-up areas within and around  
623 protected areas: Global patterns and 40-year trends. *Glob. Ecol. Conserv.* 24  
624 (2020), e01291. <https://doi.org/10.1016/j.gecco.2020.e01291>.

625 Di Minin, E., Soutullo, A., Bartesaghi, L., Rios, M., Szephegyi, M., Moilanen A., 2017.  
626 Integrating biodiversity, ecosystem services and socio-economic data to identify  
627 priority areas and landowners for conservation actions at the national scale. *Biol.*  
628 *Conserv.* 206, 56–64. <https://doi.org/10.1016/j.biocon.2016.11.037>.

629 Donald, P.F., Buchanan, G.M., Balmford, A., Bingham, H., Couturier, A.R., de la Rosa,  
630 Jr. G.E., Gacheru, P., Herzog, S.K., Jathar, G., Kingston, N., Marnewick, D.,  
631 Maurer, G., Reaney, L., Shmygaleva, T., Sklyarenko, S., Stevens, C.M.D., Butchart,  
632 S.H.M., 2019. The prevalence, characteristics and effectiveness of Aichi Target 11’s  
633 “other effective area based conservation measures” (OECMs) in Key Biodiversity  
634 Areas. *Conserv. Lett.* 12 (5), e12659. <https://doi.org/10.1111/conl.12659>.

- 635 Dudley, J.P., 1995. Bioregional parochialism and global activism. *Conserv. Biol.* 9,  
636 1332–1334. <https://doi.org/10.1046/j.1523-1739.1995.9051329.x-i1>.
- 637 Dudley, N., Jonas, H., Nelson, F., Parrish, J., Pyhala, A., Stolton, S., Watson, J.E.M.,  
638 2018. The essential role of other effective area-based conservation measures in  
639 achieving big bold conservation targets. *Glob. Ecol. Conserv.* 15, e00424.  
640 <https://doi.org/10.1016/j.gecco.2018.e00424>.
- 641 Ewers, R.M., Rodrigues, A.S.L., 2008. Estimates of reserve effectiveness are  
642 confounded by leakage. *Trends Ecol. Evol.* 23 (3), 113–116.  
643 <https://doi.org/10.1016/j.tree.2007.11.008>.
- 644 Geldmann, J. Barnes, M., Coad, L., Craigie, I.D., Hockings, M., Burgess, N.D., 2013.  
645 Effectiveness of terrestrial protected areas in reducing habitat loss and population  
646 declines. *Biol. Conserv.* 161, 230–238.  
647 <https://doi.org/10.1016/j.biocon.2013.02.018>.
- 648 Hannah, L., Roehrdanz, P.R., Marquet, P.A., Enquist, B.J., Midgley, G., Foden, W.  
649 Lovett, J.C., Corlett, R.T., Corcoran, D., Butchart, S.H.M., Boyle, B., Feng, X.,  
650 Maitner, B., Fajardo, J., McGill, B.J., Merow, C., Morueta-Holme, N., Newman,  
651 E.A., Park, D.S., Raes, N., Svenning, J-C., 2020. 30% land conservation and  
652 climate action reduces tropical extinction risk by more than 50%. *Ecography* 43(7),  
653 943–953. <https://doi.org/10.1111/ecog.05166>.
- 654 Hanski, I., 2011. Habitat loss, the dynamics of biodiversity, and a perspective of  
655 conservation. *Ambio* 40 (3), 248–255. <https://doi.org/10.1007/s13280-011-0147-3>.



- 656 Honeck, E., Moilanen, A., Guinaudeau, B., Wyler, N., Schlaepfer, M.A., Martin, P.,  
657 Sanguet, A., Urbina, L., von Arx, B., Massy, J., Fisher, C., Lehmann, A., 2020.  
658 Implementing green infrastructure for the spatial planning of peri-urban areas in  
659 Geneva, Switzerland. *Sustainability* 12 (4). 1387.  
660 <https://doi.org/10.3390/su12041387>.
- 661 Hunter, M.L. Jr., Hutchinson, A., 1994. The virtues and shortcomings of parochial-ism:  
662 Conserving species that are locally rare, but globally common. *Conserv. Biol.* 8(4),  
663 1163–1165. <https://doi.org/10.1046/j.1523-1739.1994.08041163.x>.
- 664 IPBES, 2019. Global assessment report on biodiversity and ecosystem services of the  
665 Intergovernmental Science-Policy Platform on Biodiversity and Ecosystem  
666 Services. IPBES secretariat, Bonn.
- 667 IUCN, 1994. Guidelines for protected area management categories. IUCN, Gland.
- 668 IUCN, 2016. A Global Standard for the Identification of Key Biodiversity Areas.  
669 Retrieved from, Version 1.0. IUCN, Gland.
- 670 Jenkins, C.N., Van Houtan, K.S., Pimm, S.L., Sexton, J.O., 2015. US protected lands  
671 mismatch biodiversity priorities. *Proc. Natl. Acad. Sci. U.S.A.* 112(16), 5081–5086.  
672 <https://doi.org/10.1073/pnas.1418034112>.
- 673 Jiao, Y., Ding, Y., Zha, Z., Okuro, T., 2019. Crises of biodiversity and ecosystem  
674 services in Satoyama landscape of Japan: a review on the role of management.  
675 *Sustainability* 11 (2), 454. <https://doi.org/10.3390/su11020454>.

- 676 Jiménez-Valverde, A., Lobo, J. M., 2007. Threshold criteria for conversion of  
677 probability of species presence to either–or presence–absence. *Acta Oecol.* 31 (3),  
678 361–369. <https://doi.org/10.1016/j.actao.2007.02.001>.
- 679 Jonas, H.D., Barbuto, V., Jonas, H.C., Kothari, A., Nelson, F., 2014. New steps of  
680 change: looking beyond protected areas to consider other effective area-based  
681 conservation measures. *Parks.* 20(2), 111–128.  
682 <https://doi.org/10.2305/iucn.ch.2014.parks-20-2.hdj.en>.
- 683 Jonas, H. D., MacKinnon, K., Dudley, N., Hockings, M., Jessen, S., Laffoley, D.,  
684 MacKinnon, D., Matallana-Tobón, C.L., Sand with, T., Waithaka, J., Woodley, S.,  
685 2018. Other effective area-based conservation measures: From Aichi Target 11 to  
686 the post-2020 biodiversity framework. *Parks* 24, 9–16. [https://doi.org/](https://doi.org/10.2305/IUCN.CH.2018.PARKS-24-SIHDJ.en)  
687 [10.2305/IUCN.CH.2018.PARKS-24-SIHDJ.en](https://doi.org/10.2305/IUCN.CH.2018.PARKS-24-SIHDJ.en).
- 688 Kadoya, T., Takenaka, A., Ishihama, F., Fujita, T., Ogawa, M., Katsuyama, T., Kadono,  
689 Y., Kawakubo, N., Serizawa, S., Takahashi, H., Takamiya, M., Fujii, S., Matsuda,  
690 H., Muneda, K., Yokota, M., Yonekura, K., Yahara, T., 2014. Crisis of Japanese  
691 vascular flora shown by quantifying extinction risks for 1618 taxa. *PLoS ONE* 9,  
692 e98954. <https://doi:10.1371/journal.pone.0098954>.
- 693 Kadoya, T., Washitani, I., 2011. The Satoyama Index: A biodiversity indicator for  
694 agricultural landscapes. *Agric. Ecosyst. Environ.* 140 (1-2), 20–26.  
695 <https://doi.org/10.1016/j.agee.2010.11.007>.

- 696 Katoh, K., Sakai, S., Takahashi, T., 2009. Factors maintaining species diversity in  
697 satoyama, a traditional agricultural landscape of Japan. *Biol. Conserv.* 142, 1930–  
698 1936. <https://doi.org/10.1016/j.biocon.2009.02.030>.
- 699 Kim, J.Y., Koide, D., Ishihama, F., Kadoya, T., Nishihiro, J., 2021. Current site planning  
700 of medium to large solar power systems accelerates the loss of the remaining semi-  
701 natural and agricultural habitats. *Sci. Total Environ.* 779, 146475.  
702 <https://doi.org/10.1016/j.scitotenv.2021.146475>.
- 703 Klein, C., Wilson, K., Watts, M., Stein, J., Berry, S., Carwardine, J., Smith, M.S.,  
704 Mackey, B., Possingham, H., 2009. Incorporating ecological and evolutionary  
705 processes into continental-scale conservation planning. *Ecol. Appl.* 19 (1), 206–  
706 217. <https://doi.org/10.1890/07-1684.1>.
- 707 Knight, A.T., Cowling, R.M., Boshoff, A.F., Wilson, S.L., Pierce, S.M., 2011. Walking  
708 in STEP: Lessons for linking spatial prioritisations to implementation strategies.  
709 *Biol. Conserv.* 144, 202–211. <https://doi.org/10.1016/j.biocon.2010.08.017>.
- 710 Kobori, H., Primac, R. 2003. Participatory conservation approaches for Satoyama, the  
711 traditional forest and agricultural landscape of Japan. *AMBIO* 32(4), 307–311.  
712 <https://doi.org/10.1579/0044-7447-32.4.307>.
- 713 Kozar, R., Galang, E., Alip, A., Sedhain, J., Subramanian, S., Saito O., 2019. Multi-  
714 level networks for sustainability solutions: the case of the International Partnership  
715 for the Satoyama Initiative. *Curr. Opin. Environ. Sustain.* 39, 123–134.  
716 <https://doi.org/10.1016/j.cosust.2019.09.002>.

- 717 Kubota, Y., Hirao, T., Fujii, S. J., Shiono, T., Kusumoto, B., 2014. Beta diversity of  
718 woody plants in the Japanese archipelago: the roles of geohistorical and ecological  
719 processes. *J. Biogeogr.* 41(7), 1267–1276. <https://doi.org/10.1111/jbi.12290>.
- 720 Kubota, Y., Kusumoto, B., Fujinuma, J., Shiono, T. 2017. Systematic conservation  
721 planning for biodiversity conservation: Basic concepts and outline of analysis  
722 procedure. *Japanese J. Ecol.* 67(3), 267 – 286.  
723 [https://doi.org/10.18960/seitai.67.3\\_267](https://doi.org/10.18960/seitai.67.3_267).
- 724 Kubota, Y., Kusumoto, B., Fujinuma, J., Shiono, T., Suzuki, R., Fukuhima, A., Ozawa,  
725 H., Miyara, K. 2019. Protocol for developing local biodiversity strategy and  
726 conservation action plan. *Japanese J. Ecol.* 69(3), 239 – 250.  
727 [https://doi.org/10.18960/seitai.69.3\\_239](https://doi.org/10.18960/seitai.69.3_239).
- 728 Kubota, Y., Kusumoto, B., Shiono, T., Tanaka, T., 2017. Phylogenetic properties of  
729 Tertiary relict flora in the East Asian continental islands: imprint of climatic niche  
730 conservatism and in situ diversification. *Ecography*, 40(3), 436–447.  
731 <https://doi.org/10.1111/ecog.02033>.
- 732 Kubota, Y., Shiono, T., Kusumoto, B. 2015. Role of climate and geohistorical factors in  
733 driving plant richness patterns and endemism on the east Asian continental islands.  
734 *Ecography*, 38(6), 639–648. <https://doi.org/10.1111/ecog.00981>.
- 735 Kukkala, A.S., Moilanen, A. 2013. Core concepts of spatial prioritization in systematic  
736 conservation planning: Concepts of systematic conservation planning. *Biol. Rev.*  
737 88(2), 443–464. <https://doi.org/10.1111/brv.12008>.

- 738 Kullberg, P., Di Minin, E., Moilanen, A., 2019. Using key biodiversity areas to guide  
739 effective expansion of the global protected area network. *Glob. Ecol. Conserv.* 20,  
740 e00768.
- 741 Kullberg, P., Moilanen, A., 2014. How do recent spatial biodiversity analyses support  
742 the convention on biological diversity in the expansion of the global conservation  
743 area network? *Nat. A Conserv.* 12(1), 3–10.  
744 <https://doi.org/10.4322/natcon.2014.002>.
- 745 Kusumoto, B., Shiono, T., Konoshima, M., Yoshimoto, A., Tanaka, T., Kubota, Y., 2017.  
746 How well are biodiversity drivers reflected in protected areas? A representativeness  
747 assessment of geohistorical gradients that shaped endemic flora in Japan. *Ecol. Res.*  
748 32(3), 299–311. <https://doi.org/10.1007/s11284-017-1451-6>.
- 749 Lehtomäki, J., Kusumoto, B., Shiono, T., Tanaka, T., Kubota, Y., Moilanen, A., 2019.  
750 Spatial conservation prioritization for the East Asian islands: A balanced  
751 representation of multitaxon biogeography in a protected area network. *Divers*  
752 *Distrib.* 25(3), 414–429. <https://doi.org/10.1111/ddi.12869>.
- 753 Lehtomäki, J., Tomppo, E., Kuokkanen, P., Hanski, I., Moilanen, A., 2009. Applying  
754 spatial conservation prioritization software and high-resolution GIS data to a  
755 national-scale study in forest conservation. *For. Ecol. Manage.* 258(11), 2439–  
756 2449. <https://doi.org/10.1016/j.foreco.2009.08.026>.
- 757 Mace, G.M., Barrett, M., Burgess, N.D., Cornell, S.E., Freeman, R., Grooten, M.,  
758 Purvis, A., 2018. Aiming higher to bend the curve of biodiversity loss. *Nat. Sustain.*  
759 1(9), 448–451. <https://doi.org/10.1038/s41893-018-0130-0>.

- 760 Magris, R.A., Pressey, R.L., 2018. Marine protected areas: just for show? *Science* 360  
761 (6390), 723–724. <https://doi.org/10.1126/science.aat6215>.
- 762 Maron, M., Simmonds, J.S., Watson, J.E., 2018. Bold nature retention targets are  
763 essential for the global environment agenda. *Nat. Ecol. Evol.* 2(8), 1194-1195.  
764 <https://doi.org/10.1038/s41559-018-0595-2>.
- 765 Maxwell, S.L., Cazalis, V., Dudley, N., Hoffmann, M., Rodrigues, A.S.L., Stolton, S.,  
766 Visconti, P., Woodley, S., Kingston, N., Lewis, E., Maron, M., Strassburg, B.B.N.,  
767 Wenger, A., Jonas, H.D., Venter, O., Watson, J.E.M., 2020. Area-based conservation  
768 in the twenty-first century. *Nature* 586(7828), 217–227.  
769 <https://doi.org/10.1038/s41586-020-2773-z>.
- 770 Mittermeier, R. A., Turner, W. R., Larsen, F. W., Brooks, T. M., Gascon, C., 2011.  
771 Global biodiversity conservation: the critical role of hotspots, in: Zachos, F. E.,  
772 Habel, J. C. (Eds.), *Biodiversity hotspots*. Springer, Berlin, Heidelberg, pp 3–22.  
773 [https://doi.org/10.1007/978-3-642-20992-5\\_1](https://doi.org/10.1007/978-3-642-20992-5_1).
- 774 Moilanen, A., 2007. Landscape zonation, benefit functions and target-based planning:  
775 unifying reserve selection strategies. *Biol. Conserv.* 134(4), 571–579.  
776 <https://doi.org/10.1016/j.biocon.2006.09.008>.
- 777 Moilanen, A., Anderson, B.J., Eigenbrod, F., Heinemeyer, A., Roy, D.B., Gillings, S.,  
778 Armsworth, P.R., Gaston, K.J., Thomas, C.D., 2011. Balancing alternative land uses  
779 in conservation prioritization. *Ecol. Appl.* 21(5), 1419–1426.  
780 <https://doi.org/10.1890/10-1865.1>.

- 781 Moilanen, A., Arponen, A., 2011. Setting conservation targets under budgetary  
782 constraints. *Biol. Conserv.* 144(1), 650–653.  
783 <https://doi.org/10.1016/j.biocon.2010.09.006>.
- 784 Moilanen, A., Pouzols, F.M., Meller, L., Veach, V., Arponen, A., Leppänen, J., Kujala,  
785 H., 2014. Zonation - Spatial Conservation Planning Methods and Software. Version  
786 4. User Manual. University of Helsinki, Helsinki.
- 787 Moilanen, A., Wilson, K.A., Possingham, H.P. (Eds.), 2009. Spatial Conservation  
788 Prioritization. Oxford University Press, New York.
- 789 Montesino Pouzols, F., Toivonen, T., Di Minin, E., Kukkala, A., Kullberg, P., Kuusterä,  
790 J., Lehtomäki, J., Tenkanen, H., Verburg, P.H., Moilanen, A., 2014. Global  
791 protected area expansion is compromised by projected land-use and parochialism.  
792 *Nature* 516(7531), 383–386. <https://doi.org/10.1038/nature14032>.
- 793 Noss, R.F., Dobson, A.P., Baldwin, R., Beier, P., Davis, C.R., Dellasala, D.A., Francis,  
794 J., Locke, H., Nowak, K., Lopez, R., Reining, C., Trombulak, S.C., Tabor, G., 2012.  
795 Bolder thinking for conservation. *Conserv. Biol.* 26(1), 1–4.  
796 <https://doi.org/10.1111/j.1523-1739.2011.01738.x>.
- 797 Phillips, S. J., Anderson, R. P., Schapire, R. E., 2006. Maximum entropy modeling of  
798 species geographic distributions. *Ecol. Model.* 190 (3-4), 231–259.  
799 <https://doi.org/10.1016/j.ecolmodel.2005.03.026>.
- 800 Pimm, S.L., Jenkins, C.N., Li B.V., 2018. How to protect half of Earth to ensure it  
801 protects sufficient biodiversity. *Sci. Adv.* 4(8).  
802 <https://doi.org/10.1126/sciadv.aat2616>.

- 803 Saura, S., Bastin, L., Battistella, L., Mandrici, A., Dubois, G., 2017. Protected areas in  
804 the world's ecoregions: How well connected are they?. *Ecol. Indic.* 76, 144–158.  
805 <https://doi.org/10.1016/j.ecolind.2016.12.047>.
- 806 Saura, S., Bertzky, B., Bastin, L., Battistella, L., Mandrici, A., Dubois, G., 2018.  
807 Protected area connectivity: Shortfalls in global targets and country-level priorities.  
808 *Biol. Conserv.* 219, 53–67. <https://doi.org/10.1016/j.biocon.2017.12.020>.
- 809 Svancara, L.K., Brannon, R., Scott, J.M., Groves, C.R., Noss, R.F., Pressey, R.L., 2005.  
810 Policy-driven vs. evidence-based conservation: a review of political targets and  
811 biological needs. *BioScience* 55(11), 989–995. [https://doi.org/10.1641/0006-](https://doi.org/10.1641/0006-3568(2005)055[0989:PVECAR]2.0.CO;2)  
812 [3568\(2005\)055\[0989:PVECAR\]2.0.CO;2](https://doi.org/10.1641/0006-3568(2005)055[0989:PVECAR]2.0.CO;2).
- 813 Swift, T.L., Hannon, S.J., 2010. Critical thresholds associated with habitat loss: a review  
814 of the concepts, evidence, and applications. *Biol. Rev.* 85(1), 35–53.  
815 [doi:10.1111/j.1469-185X.2009.00093.x](https://doi.org/10.1111/j.1469-185X.2009.00093.x).
- 816 Takeuchi, K., 2010. Rebuilding the relationship between people and nature: the  
817 Satoyama Initiative. *Ecol. Res.* 25, 891–897. [https://doi.org/10.1007/s11284-010-](https://doi.org/10.1007/s11284-010-0745-8)  
818 [0745-8](https://doi.org/10.1007/s11284-010-0745-8).
- 819 Venter, O., Fuller, R.A., Segan, D.B., Carwardine, J., Brooks, T.M., Butchart, S.H.M.,  
820 Di Marco, M., Iwamura, T., Joseph, L., O'Grady, D., Possingham, H.P., Rondinini,  
821 C., Smith, R.J., Venter, M., Watson, J.E.M., 2014. Targeting global protected area  
822 expansion for imperiled biodiversity. *PLoS Biology* 12(6), e1001891.  
823 <https://doi.org/10.1371/journal.pbio.1001891>.



- 824 Washitani I., 2001. Traditional sustainable ecosystem “SATOYAMA” and biodiversity  
825 crisis in Japan conservation ecological perspective. *Glob. Environ. Res.* 5, 119–133.
- 826 Watson, J.E.M., Dudley, N., Segan, D.B., Hockings, M., 2014. The performance and  
827 potential of protected areas. *Nature* 515 (7525), 67–73.  
828 <https://doi.org/10.1038/nature13947>.
- 829 Wells, J.V., Robertson, B., Rosenberg, K.V., Mehlman, D.W., 2010. Global versus Local  
830 Conservation Focus of U.S. State Agency Endangered Bird Species Lists. *PLoS*  
831 *ONE* 5, e8608. <https://doi:10.1371/journal.pone.0008608>.
- 832 Wilson E.O., 2016. *Half-earth: our planet’s fight for life*. WW Norton and Company,  
833 New York.
- 834 Xu, H., Cao, Y., Yu, D., Cao, M., He, Y., Gill, M., Pereira, H.M., 2021. Ensuring  
835 effective implementation of the post-2020 global biodiversity targets. *Nat. Ecol.*  
836 *Evol.* 5(4), 411-418. <https://doi.org/10.1038/s41559-020-01375-y>.
- 837 Zafra-Calvo, N., Pascual, U., Brockington, D., Coolsaet, B., Cortes-Vazquez, J.A.,  
838 Gross-Camp, N., Palomo, I., Burgess, N.D., 2017. Towards an indicator system to  
839 assess equitable management in protected areas. *Biol. Conserv.* 211, 134–141.  
840 <https://doi.org/10.1016/j.biocon.2017.05.014>.

841

842

843 **Supplemental materials**

844

845 **Table S1.** Amount of species occurrence data used to predict species distribution on the

846 J-BMP database.

847

| Taxon           | Number of species | Number of occurrences |
|-----------------|-------------------|-----------------------|
| Vascular plants | 7,346             | 7,520,572             |
| Mammals         | 136               | 2,049,450             |
| Birds           | 607               | 3,011,635             |
| Reptiles        | 103               | 71,627                |
| Amphibians      | 77                | 112,109               |
| Freshwater fish | 231               | 601248                |
| Total           | 8,500             | 13,366,641            |

848

849

850 **Table S2.** List of environment variables used to infer species distribution.  
851

| No. | Environmental value                                        | source                          |
|-----|------------------------------------------------------------|---------------------------------|
| 1   | Annual Mean Temperature                                    | JMA's Mesh Climate Data 2000    |
| 2   | Mean Diurnal Range (Mean of monthly (max temp - min temp)) |                                 |
| 3   | Isothermality (* 100)                                      |                                 |
| 4   | Temperature Seasonality (standard deviation *100)          |                                 |
| 5   | Max Temperature of Warmest Month                           |                                 |
| 6   | Min Temperature of Coldest Month                           |                                 |
| 7   | Temperature Annual Range                                   |                                 |
| 8   | Mean Temperature of Wettest Quarter                        |                                 |
| 9   | Mean Temperature of Driest Quarter                         |                                 |
| 10  | Mean Temperature of Warmest Quarter                        |                                 |
| 11  | Mean Temperature of Coldest Quarter                        |                                 |
| 12  | Annual Precipitation                                       |                                 |
| 13  | Precipitation of Wettest Month                             |                                 |
| 14  | Precipitation of Driest Month                              |                                 |
| 15  | Precipitation Seasonality (Coefficient of Variation)       |                                 |
| 16  | Precipitation of Wettest Quarter                           |                                 |
| 17  | Precipitation of Driest Quarter                            |                                 |
| 18  | Precipitation of Warmest Quarter                           |                                 |
| 19  | Precipitation of Coldest Quarter                           |                                 |
| 20  | Maximum snow depth                                         |                                 |
| 21  | Average annual solar radiation                             |                                 |
| 22  | Total annual sunshine hours                                |                                 |
| 23  | Natural forest area                                        | Ministry of the Environment,    |
| 24  | Secondary forest area                                      | 1/50,000 Vegetation survey      |
| 25  | Planted forest area                                        | (2nd - 5th) and 1/25,000        |
| 26  | Natural grassland area                                     | vegetation survey (6th and 7th) |
| 27  | Secondary grassland area                                   |                                 |
| 28  | Natural forest area within 5km                             |                                 |
| 29  | Secondary forest area within 5 km                          |                                 |
| 30  | Planted area within 5km                                    |                                 |
| 31  | Natural grassland area within 5 km                         |                                 |

|    |                                          |                                  |
|----|------------------------------------------|----------------------------------|
| 32 | Secondary grassland area within 5 km     |                                  |
| 33 | Agricultural land area                   | Japanese National Land           |
| 34 | Paddy area                               | Numerical Information,           |
| 35 | City area                                | Landuse Subdivision Mesh         |
| 36 | Wasteland area                           |                                  |
| 37 | Beach area                               |                                  |
| 38 | Agricultural land area within 5km        |                                  |
| 39 | Paddy field area within 5km              |                                  |
| 40 | Urban area within 5km                    |                                  |
| 41 | Wasteland area within 5km                |                                  |
| 42 | Beach area within 5km                    |                                  |
| 43 | Land area                                |                                  |
| 44 | Water area                               |                                  |
| 45 | Elevation                                | Japanese National Land Numerical |
| 46 | Standard deviation of elevation          | Information, Elevation and slope |
| 47 | Slope angle                              | angle tertiary mesh              |
| 48 | Distance from the sea                    | Japanese National Land Numerical |
|    |                                          | Information, coastline           |
| 49 | Geology                                  | 1:500,000 Fundamental Land       |
|    |                                          | Classification Survey soil map   |
| 50 | Cation exchange capacity of surface soil | SoilGrid                         |
| 51 | Amount of organic carbon in surface soil |                                  |
| 52 | Surface soil pH                          |                                  |

---

852

853

854 **Table S3.** Types of Japanese protected areas and their legal strictness regarding land  
855 use.

| Basis laws                                                                  | Types of protected areas              | Zoning areas                            | Legal strictness |
|-----------------------------------------------------------------------------|---------------------------------------|-----------------------------------------|------------------|
| Natural Park Law                                                            | National park                         | Special Protection Area                 | Strict           |
|                                                                             |                                       | Classes I Special Zone                  | Strict           |
|                                                                             |                                       | Classes II Special Zone                 | Medium           |
|                                                                             |                                       | Classes III Special Zone                | Medium           |
|                                                                             |                                       | Ordinary Area                           | Low              |
|                                                                             |                                       | Classification undecided                | Low              |
|                                                                             | Quasi-national park                   | Special Protection Area                 | Strict           |
|                                                                             |                                       | Classes I Special Zone                  | Strict           |
|                                                                             |                                       | Classes II Special Zone                 | Medium           |
|                                                                             |                                       | Classes III Special Zone                | Medium           |
|                                                                             | Prefectural natural park              | Ordinary Area                           | Low              |
|                                                                             |                                       | Special Protection Area                 | Strict           |
|                                                                             |                                       | Classes I Special Zones                 | Strict           |
| Classes II Special Zones                                                    |                                       | Medium                                  |                  |
| Classes III Special Zones                                                   |                                       | Medium                                  |                  |
| Natural Environment Conservation Law                                        | Wilderness Areas                      |                                         | Strict           |
|                                                                             |                                       |                                         |                  |
|                                                                             | Nature Conservation Areas             | Special Area                            | Strict           |
|                                                                             |                                       | Ordinary Area                           | Low              |
|                                                                             | Prefectural Nature Conservation Areas | Special Area                            | Strict           |
|                                                                             |                                       | Ordinary Area                           | Low              |
| Protection and Control of Wild Birds and Mammals and Hunting Management Law | National Wildlife Protection Areas    | Special Protection Specified Area       | Strict           |
|                                                                             |                                       | Special Protection Area                 | Medium           |
|                                                                             |                                       | Area except for Special Protection Area | Low              |
|                                                                             | Prefectural Wildlife Protection Areas | Special Protection Specified Area       | Strict           |
|                                                                             |                                       | Special Protection Area                 | Medium           |
|                                                                             |                                       | Area except for Special Protection Area | Low              |
| Law for the Conservation of Endangered Species of Wild Fauna and Flora      | Natural Habitat Conservation Areas    | Managed Area                            | Strict           |
|                                                                             |                                       | Monitoring Area                         | Low              |
| Act Concerning Utilization of National Forest Land                          | Forest Reserve                        | Preservation Area                       | Strict           |
|                                                                             |                                       | Conservation and Utilization Zone       | Medium           |
|                                                                             | Green corridor                        |                                         | Low              |

856 **Fig S1.** Species distribution prediction results for 8,500 species of all vascular plants  
857 and vertebrates in Japan. Mean and median values of AUC were 0.949 and 0.983,  
858 respectively.  
859

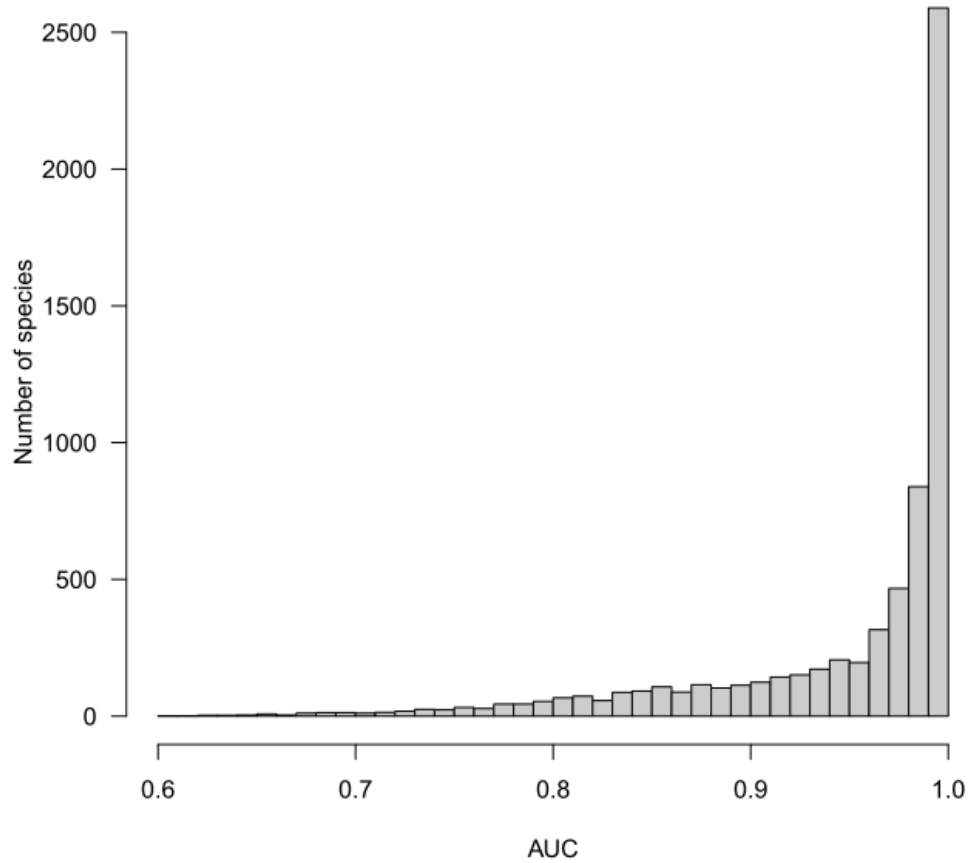

860  
861  
862

863 **Fig. S2.** Conservation effectiveness of the current protected area (PA) network and 30%  
864 land conservation scenario in the post-2020 Global Biodiversity Framework target that  
865 expands into non-PAs. PAs effectiveness was evaluated by the reduction of aggregated  
866 relative extinction risk based on each taxon distributed in Japan. Red, green and blue  
867 curves show conservation effectiveness of the high-, medium- and low-ranked PAs,  
868 respectively, with increasing PA coverage across mask layers of land-use types. The solid  
869 line shows the conservation effectiveness of the current PA network. The dashed line  
870 shows the expected conservation effectiveness of a comprehensive approach that  
871 combines land-sparing protection and other effective area-based conservation measures  
872 (OECM) in satoyama and urban areas: specifically, high-ranked PAs expand into remote  
873 state-owned areas (national forests), medium-ranked PAs expand into satoyama and  
874 agricultural areas, and low-ranked PAs expand into urban areas. The dotted line shows  
875 the expected conservation effectiveness of a conventional approach that only expands  
876 PAs into national land areas (national forests).

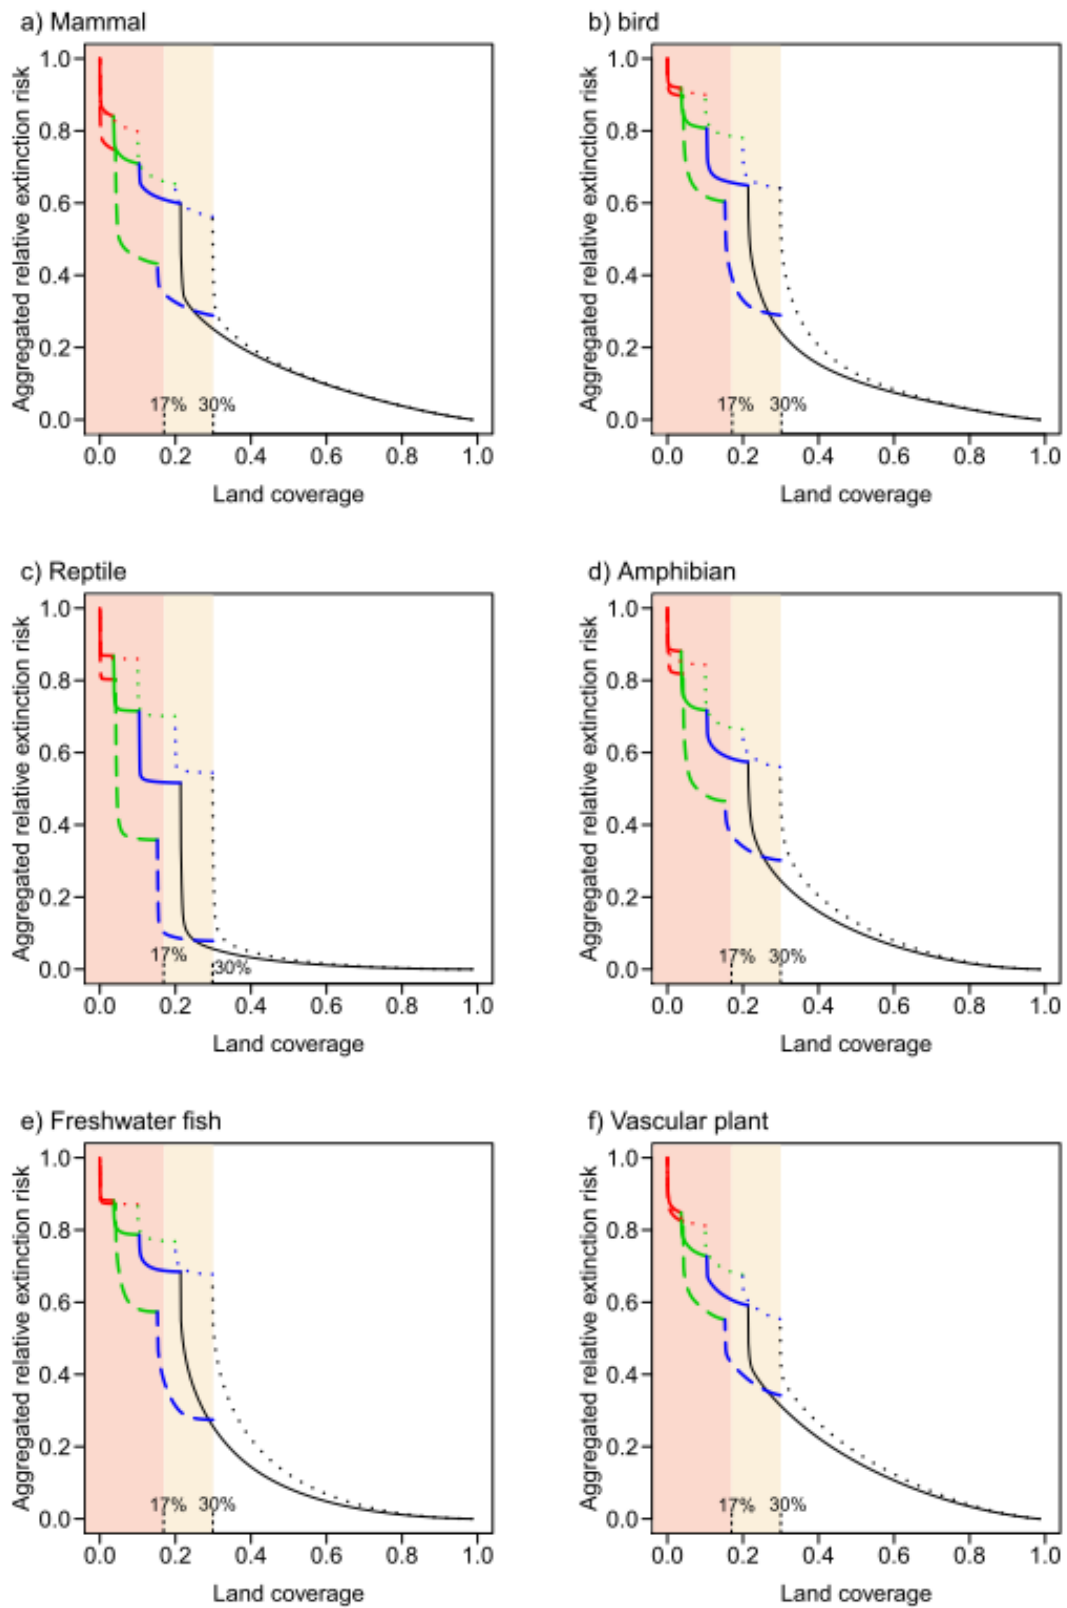

877

878



879 **Fig. S3.** Population density on the inside and outside of existing protected areas (PAs).  
880 Population density (/km<sup>2</sup>) was evaluated in high-ranked PA (High), medium-ranked PA  
881 (Medium), low-ranked PA (Low), surrounding non-PAs (Surrounding), expanded PAs  
882 under the post-2020 Global Biodiversity Framework target (Expand), and all over Japan  
883 based on land types (Japan).

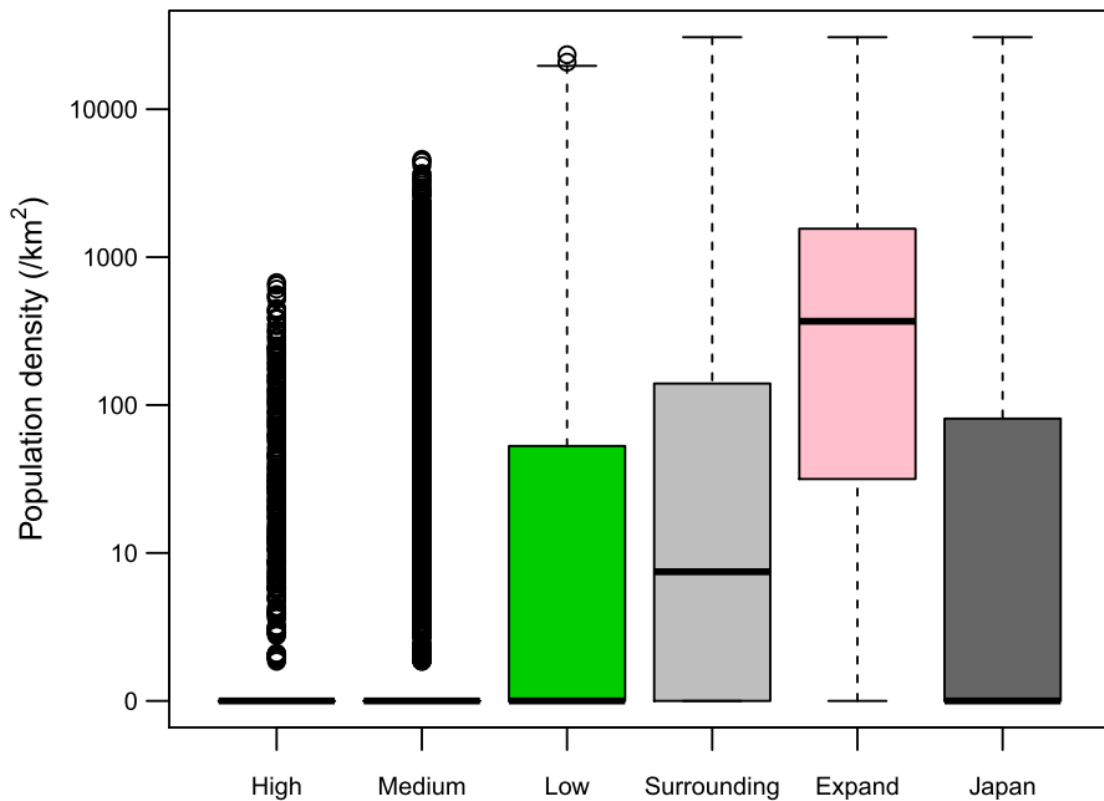

884  
885  
886  
887
